# Supplementary material
Source: publisher figshare collection journal article supplement (https://asha.figshare.com/ndownloader/files/18896138)
Supplement: Supplementary file 1 [file 18896138]

**Supplemental Material S1.** Individual characteristics for participants with developmental language disorder (DLD) with respect to age, gender, and the following test scores: productive vocabulary (Picture Naming: bold score  $\approx -1.25$  SD according to grade-level Z score for participants with typical development [TD]); receptive vocabulary (Peabody Picture Vocabulary Test–Revised [PPVT-R]: bold score  $\approx -1.25$  SD according to grade-level Z score for participants with TD); receptive grammar (TROG-2 = Test for Reception of Grammar–Second Edition [TROG-2]: bold score  $\approx -1.25$  SD; i.e.,  $\leq$  standard score 81.25); productive grammar (Clinical Evaluation of Language Fundamentals–Fourth Edition [CELF-4], Formulated Sentences: bold score  $\approx -1.25$  SD; i.e.,  $\leq$  scaled score 6.25; the Scandinavian version of test is only normed up to 12;11 years, so for older participants the norms for 12;0–12;11 were used); parental communication rating (Children’s Communication Checklist–2 [CCC-2]: bold score  $\approx$  General Communication Composite below cut-off [54  $\approx$  the 10<sup>th</sup> percentile]); nonverbal cognitive skills (matrices: bold score  $\approx -2$  SD, i.e.,  $\leq$  T-score 30); verbal short-term memory (STM; CELF-4, Forward Digit Span, scaled score; the Scandinavian version of test is only normed up to 12;11 years, so for older participants the norms for 12;0–12;11 were used); verbal working memory (WM; CELF-4, Backward Digit Span, scaled score; the Scandinavian version of test is only normed up to 12;11 years, so for older participants the norms for 12;0–12;11 were used); sentence recall (CELF-4, Recalling Sentences, scaled score; the Scandinavian version of test is only normed up to 12;11 years, so for older participants the norms for 12;0–12;11 were used), and hearing screening (passed: 500, 1000, 2000, and 4000 Hz tones to both ears passed at 20 dB; tones mentioned were not passed at 20 dB).

| Participant code | Age  | Gender | Productive vocabulary (Z score) | Receptive vocabulary (Z score) | Receptive grammar (standard score, $M = 100$ , $SD = 15$ ) | Productive grammar (scaled score, $M = 10$ , $SD = 3$ ) | Parental communication rating | Nonverbal cognitive skills (T-score, $M = 50$ , $SD = 10$ ) | Verbal STM (scaled score, $M = 10$ , $SD = 3$ ) | Verbal WM (scaled score, $M = 10$ , $SD = 3$ ) | Sentence recall (scaled score, $M = 10$ , $SD = 3$ ) | Hearing screening                                                           | Other information                                                             |
|------------------|------|--------|---------------------------------|--------------------------------|------------------------------------------------------------|---------------------------------------------------------|-------------------------------|-------------------------------------------------------------|-------------------------------------------------|------------------------------------------------|------------------------------------------------------|-----------------------------------------------------------------------------|-------------------------------------------------------------------------------|
| Y-DLD-1          | 5;10 | Male   | <b>-2.79</b>                    | -0.01                          | <b>80</b>                                                  | 7                                                       | <b>39</b>                     | 50                                                          | 4                                               | 10                                             | —                                                    | Passed                                                                      |                                                                               |
| Y-DLD-2          | 7;10 | Female | <b>-3.75</b>                    | -0.92                          | <b>55</b>                                                  | 2                                                       | <b>51</b>                     | 45                                                          | 4                                               | 1                                              | 4                                                    | —<br>left 500+1000Hz at 30 dB                                               |                                                                               |
| Y-DLD-3          | 7;6  | Male   | <b>-2.51</b>                    | -1.12                          | 84                                                         | <b>3</b>                                                | 69                            | 43                                                          | 2                                               | 7                                              | 5                                                    | —<br>left 500+2000<br>+4000 Hz at 30 dB                                     | CCC-2:<br>Scaled score<br>2 for Speech<br>and 6 for<br>Syntax &<br>Morphology |
| Y-DLD-4          | 8;6  | Male   | <b>-1.86</b>                    | -0.76                          | 103                                                        | <b>3</b>                                                | <b>30</b>                     | 53                                                          | 12                                              | 8                                              | 3                                                    | Passed                                                                      |                                                                               |
| Y-DLD-5          | 7;11 | Male   | <b>-5.83</b>                    | <b>-2.60</b>                   | <b>59</b>                                                  | <b>3</b>                                                | <b>31</b>                     | 48                                                          | 4                                               | 7                                              | 1                                                    | Passed                                                                      |                                                                               |
| Y-DLD-6          | 8;2  | Female | <b>-2.40</b>                    | <b>-3.24</b>                   | 88                                                         | 8                                                       | <b>52</b>                     | 52                                                          | 3                                               | 7                                              | 1                                                    | Passed                                                                      |                                                                               |
| Y-DLD-7          | 9;1  | Male   | <b>-4.57</b>                    | <b>-3.11</b>                   | <b>67</b>                                                  | <b>1</b>                                                | <b>53</b>                     | 52                                                          | 4                                               | 8                                              | 1                                                    | —<br>right 2000 Hz +<br>left 4000 Hz at 30<br>dB, right 4000 Hz<br>at 40 dB |                                                                               |
| Y-DLD-8          | 8;6  | Male   | <b>-1.68</b>                    | <b>-1.46</b>                   | 98                                                         | <b>1</b>                                                | <b>31</b>                     | 50                                                          | 12                                              | 8                                              | 2                                                    | —<br>right 500+2000+<br>4000 Hz at 30 dB                                    |                                                                               |

| Participant code | Age  | Gender | Productive vocabulary (Z score)                         | Receptive vocabulary (Z score) | Receptive grammar (standard score, <i>M</i> = 100, <i>SD</i> = 15) | Productive grammar (scaled score, <i>M</i> = 10, <i>SD</i> = 3) | Parental communication rating | Nonverbal cognitive skills (T-score, <i>M</i> = 50, <i>SD</i> = 10) | Verbal STM (scaled score, <i>M</i> = 10, <i>SD</i> = 3) | Verbal WM (scaled score, <i>M</i> = 10, <i>SD</i> = 3) | Sentence recall (scaled score, <i>M</i> = 10, <i>SD</i> = 3) | Hearing screening               | Other information                                                                                                                         |
|------------------|------|--------|---------------------------------------------------------|--------------------------------|--------------------------------------------------------------------|-----------------------------------------------------------------|-------------------------------|---------------------------------------------------------------------|---------------------------------------------------------|--------------------------------------------------------|--------------------------------------------------------------|---------------------------------|-------------------------------------------------------------------------------------------------------------------------------------------|
| Y-DLD-9          | 7;7  | Male   | -3.89                                                   | 0.50                           | 64                                                                 | 5                                                               | 42                            | 49                                                                  | 5                                                       | 9                                                      | 4                                                            | —<br>left 4000 Hz at 30 dB      |                                                                                                                                           |
| Y-DLD-10         | 7;7  | Male   | -2.51                                                   | -2.14                          | 84                                                                 | 1                                                               | Invalid                       | 45                                                                  | 5                                                       | 11                                                     | 6                                                            | —<br>left 500 Hz at 30 dB       |                                                                                                                                           |
| Y-DLD-11         | 9;11 | Male   | -5.10                                                   | -1.47                          | 93                                                                 | 5                                                               | 12                            | 49                                                                  | 6                                                       | 6                                                      | 2                                                            | —<br>right 500+4000 Hz at 30 dB |                                                                                                                                           |
| Y-DLD-12         | 8;5  | Female | -2.37                                                   | -2.14                          | 62                                                                 | 1                                                               | Invalid                       | 43                                                                  | 3                                                       | 8                                                      | 1                                                            | —<br>refused to participate     |                                                                                                                                           |
| Y-DLD-13         | 6;4  | Male   | test discontinued: severe word finding problems (-4.13) | -0.58                          | 88                                                                 | 1                                                               | -                             | 59                                                                  | 10                                                      | 9                                                      | 5                                                            | Passed                          |                                                                                                                                           |
| Y-DLD-14         | 8;7  | Female | -4.06                                                   | -1.59                          | 83                                                                 | 1                                                               | Invalid                       | 41                                                                  | 8                                                       | 8                                                      | 4                                                            | Passed                          | Danish-Swahili bilingual                                                                                                                  |
| Y-DLD-15         | 6;2  | Male   | -1.72                                                   | -2.57                          | 64                                                                 | 4                                                               | 36                            | 70                                                                  | 5                                                       | 6                                                      | 1                                                            | —<br>could not participate      | Danish-English bilingual                                                                                                                  |
| Y-DLD-16         | 6;7  | Male   | -2.06                                                   | 0.49                           | 71                                                                 | 1                                                               | —                             | 46                                                                  | 6                                                       | 10                                                     | 3                                                            | —<br>left 500+4000 Hz at 30 dB  |                                                                                                                                           |
| O-DLD-1          | 11;1 | Male   | -5.99                                                   | -1.04                          | 101                                                                | 4                                                               | 49                            | 52                                                                  | 5                                                       | 7                                                      | 2                                                            | Passed                          | Learning disability diagnosis in 1 <sup>st</sup> grade, but admitted into a language unit where unimpaired nonverbal skills are required. |

| Participant code | Age   | Gender | Productive vocabulary (Z score) | Receptive vocabulary (Z score) | Receptive grammar (standard score, <i>M</i> = 100, <i>SD</i> = 15) | Productive grammar (scaled score, <i>M</i> = 10, <i>SD</i> = 3) | Parental communication rating | Nonverbal cognitive skills (T-score, <i>M</i> = 50, <i>SD</i> = 10) | Verbal STM (scaled score, <i>M</i> = 10, <i>SD</i> = 3) | Verbal WM (scaled score, <i>M</i> = 10, <i>SD</i> = 3) | Sentence recall (scaled score, <i>M</i> = 10, <i>SD</i> = 3) | Hearing screening | Other information                                                                                                   |
|------------------|-------|--------|---------------------------------|--------------------------------|--------------------------------------------------------------------|-----------------------------------------------------------------|-------------------------------|---------------------------------------------------------------------|---------------------------------------------------------|--------------------------------------------------------|--------------------------------------------------------------|-------------------|---------------------------------------------------------------------------------------------------------------------|
|                  |       |        |                                 |                                |                                                                    |                                                                 |                               |                                                                     |                                                         |                                                        |                                                              |                   | Good function indicated in teacher and parent reports and T-scores 65 on Spatial Span and 48 on Picture Arrangement |
| O-DLD-2          | 11;3  | Male   | -1.66                           | 0.09                           | 71                                                                 | 1                                                               | Invalid                       | 41                                                                  | 8                                                       | 8                                                      | 7                                                            | Passed            |                                                                                                                     |
| O-DLD-3          | 11;9  | Female | -5.53                           | -2.28                          | 76                                                                 | 1                                                               | 9                             | 47                                                                  | 3                                                       | 10                                                     | 1                                                            | Passed            |                                                                                                                     |
| O-DLD-4          | 11;10 | Male   | -2.22                           | -1.33                          | 96                                                                 | 5                                                               | 56                            | 47                                                                  | 7                                                       | 8                                                      | 5                                                            | Passed            | CCC-2: Scaled score 4 for Speech, 6 for Syntax & Morphology and Coherence, and 5 for Semantics                      |
| O-DLD-5          | 11;6  | Male   | -1.47                           | 0.85                           | 106                                                                | 6                                                               | 55                            | 45                                                                  | 10                                                      | 12                                                     | 7                                                            | Passed            | CCC-2: Scaled score 2 for Speech and, 5 for Syntax & Morphology and Semantics                                       |
| O-DLD-6          | 12;1  | Male   | -3.16                           | -0.19                          | 96                                                                 | 5                                                               | 25                            | 56                                                                  | 8                                                       | 7                                                      | 1                                                            | Passed            |                                                                                                                     |
| O-DLD-7          | 14;1  | Male   | -2.11                           | -0.89                          | 84                                                                 | 1                                                               | 70                            | 56                                                                  | 7                                                       | 5                                                      | 7                                                            | Passed            | CCC-2: 4 for Speech, 6 for Syntax & Morphology and Coherence,                                                       |

| Participant code | Age  | Gender | Productive vocabulary (Z score) | Receptive vocabulary (Z score) | Receptive grammar (standard score, <i>M</i> = 100, <i>SD</i> = 15) | Productive grammar (scaled score, <i>M</i> = 10, <i>SD</i> = 3) | Parental communication rating | Nonverbal cognitive skills (T-score, <i>M</i> = 50, <i>SD</i> = 10) | Verbal STM (scaled score, <i>M</i> = 10, <i>SD</i> = 3) | Verbal WM (scaled score, <i>M</i> = 10, <i>SD</i> = 3) | Sentence recall (scaled score, <i>M</i> = 10, <i>SD</i> = 3) | Hearing screening                            | Other information                                                                    |
|------------------|------|--------|---------------------------------|--------------------------------|--------------------------------------------------------------------|-----------------------------------------------------------------|-------------------------------|---------------------------------------------------------------------|---------------------------------------------------------|--------------------------------------------------------|--------------------------------------------------------------|----------------------------------------------|--------------------------------------------------------------------------------------|
|                  |      |        |                                 |                                |                                                                    |                                                                 |                               |                                                                     |                                                         |                                                        |                                                              |                                              | and 5 for Semantics                                                                  |
| O-DLD-8          | 13;8 | Male   | <b>-2.11</b>                    | -1.20                          | 101                                                                | 2                                                               | 49                            | 48                                                                  | 10                                                      | 7                                                      | 8                                                            | Passed                                       |                                                                                      |
| O-DLD-9          | 13;2 | Male   | <b>-3.57</b>                    | <b>-1.67</b>                   | 91                                                                 | 2                                                               | 47                            | 50                                                                  | 5                                                       | 6                                                      | 2                                                            | Passed                                       | ADHD<br>Has developed a stutter                                                      |
| O-DLD-10         | 11;4 | Female | <b>-2.78</b>                    | -0.95                          | <b>81</b>                                                          | 1                                                               | 73                            | 35                                                                  | 7                                                       | 8                                                      | 6                                                            | —<br>right 500 Hz + left<br>2000 Hz at 30 dB | CCC-2: 6 for Speech, 4 for Syntax & Morphology and Semantics                         |
| O-DLD-11         | 13;2 | Female | <b>-6.90</b>                    | <b>-3.14</b>                   | 55                                                                 | 2                                                               | 62                            | 38                                                                  | 2                                                       | 6                                                      | 1                                                            | —<br>right 2000 Hz at 30 dB                  | CCC-2: 4 for Speech, 3 for Syntax & Morphology, 6 for Semantics, and 5 for Coherence |
